# Supplementary material for: Two distinct DNA sequences recognized by transcription factors represent enthalpy and entropy optima
Source: PubMed Central journal article supplement (PMC5896879; doi:10.7554/elife.32963), 2018-04-11
Supplement: elife-32963-supp1.pdf [file elife-32963-supp1.pdf]

**Supplementary file 1.**

**Thermodynamic characteristics of TF:DNA complexes measured by Isothermal Titration Calorimetry (ITC)\*.**

| <b>Protein:DNA</b>                    | <b>Number of sites, N, sites</b> | <b>K<sub>d</sub>, M<sup>-1</sup></b> | <b>ΔH, cal/mol</b> | <b>TΔS, cal/mol</b> | <b>ΔG, kcal/mol</b> |
|---------------------------------------|----------------------------------|--------------------------------------|--------------------|---------------------|---------------------|
| <b>HOXB13:DNA<sup>CAA</sup></b>       | 0.904±0.005                      | 2.44E7±5.7E6                         | -2.125E4±250.8     | -1.117E4            | -10.07              |
| <b>HOXB13:DNA<sup>TCG</sup></b>       | 0.941±0.002                      | 2.17E7±2.5E6                         | -1.495E4±87.4      | -5006               | -9.94               |
| <b>**HOXB13:DNA<sup>methTCG</sup></b> | 1.12±0.011                       | 8.31E7±7.53E7                        | -1.303E4±313.5     | -2235               | -10.82              |
| <b>CDX2:DNA<sup>CAA</sup></b>         | 0.942±0.008                      | 9.54E6±3.3E6                         | -9472±198.7        | 44.7                | -9.51               |
| <b>CDX2:DNA<sup>TCG</sup></b>         | 0.964±0.003                      | 3.17E7±7.02E6                        | -6577±42.0         | 3665                | -10.24              |
| <b>BARHL2:DNA<sup>AC</sup></b>        | 0.966±0.007                      | 6.59E5±4.43E4                        | -1.057E4±108.6     | -2622               | -7.931.07           |
| <b>BARHL2:DNA<sup>TT</sup></b>        | 1.07±0.006                       | 5.35E5±3.01E4                        | -5563±41.7         | 2250                | -7.81               |
| <b>MYF5:DNA<sup>AACAGCTGTT</sup></b>  | 0.976±0.01                       | 3.58E6±5.78                          | -3.069E4±446.3     | -2.175E4            | -8.93               |
| <b>MYF5:DNA<sup>GTCAGCTGAC</sup></b>  | 0.851±0.008                      | 3.16E6±5.76E5                        | -1.747E4±350.2     | -8612               | -8.86               |

\*All data were measured at 298 K in 20 mM HEPES (pH 7.5), 300 mM NaCl, 10% glycerol, 2 mM TCEP buffer.

Values represent at least three independent experiments corresponding to the average deviation.

\*\* The data for HOXB13:DNA<sup>methTCG</sup> are published in Yin et al., (2017) Science, May 5;356(6337) and presented here for comparison.
